# Supplementary material
Source: HighWire-hosted journal article supplement (http://ebm.bmjjournals.com/highwire/filestream/142120/field_highwire_adjunct_files/0/ebmed-2013-101637supp1.pdf)
Supplement: ebmed-2013-101637supp1.pdf [file ebmed-2013-101637supp1.pdf]

**Web only file 1: Search strategy.**

*Literature searches were performed on August 13th, 2013.*

**Ovid SP Embase Classic+Embase 1947 to Present**

|    |                                                   |         |
|----|---------------------------------------------------|---------|
| 1  | stard.ti,ab.                                      | 610     |
| 2  | (reporting adj3 standard\$ adj3 diagnos\$).ti,ab. | 199     |
| 3  | (quality adj4 report\$ adj6 diagnos\$).ti,ab.     | 174     |
| 4  | (reporting adj3 standard\$ adj3 accuracy).ti,ab.  | 165     |
| 5  | (quality adj4 report\$ adj6 accuracy).ti,ab.      | 96      |
| 6  | or/1-5                                            | 855     |
| 7  | "review"/                                         | 1988330 |
| 8  | review\$.ti,ab.                                   | 1459791 |
| 9  | MEDLINE.tw.                                       | 64633   |
| 10 | exp systematic review/ or systematic review.tw.   | 83327   |
| 11 | meta-analysis/                                    | 74817   |
| 12 | (search* adj12 (literature or database?)).ti,ab.  | 80642   |
| 13 | or/7-12                                           | 2855260 |
| 14 | 6 and 13                                          | 313     |

**Ovid SP Ovid MEDLINE(R) In-Process & Other Non-Indexed Citations and Ovid MEDLINE(R) 1946 to Present**

|    |                                                   |         |
|----|---------------------------------------------------|---------|
| 1  | stard.ti,ab.                                      | 453     |
| 2  | (reporting adj3 standard\$ adj3 diagnos\$).ti,ab. | 166     |
| 3  | (quality adj4 report\$ adj6 diagnos\$).ti,ab.     | 140     |
| 4  | (reporting adj3 standard\$ adj3 accuracy).ti,ab.  | 143     |
| 5  | (quality adj4 report\$ adj6 accuracy).ti,ab.      | 80      |
| 6  | or/1-5                                            | 654     |
| 7  | review\$.ti,ab.                                   | 1250160 |
| 8  | review.pt.                                        | 1893377 |
| 9  | MEDLINE.tw.                                       | 62288   |
| 10 | systematic review.tw.                             | 44661   |
| 11 | meta-analysis.pt.                                 | 49854   |
| 12 | (search* adj12 (literature or database?)).ti,ab.  | 72043   |
| 13 | or/7-12                                           | 2537849 |
| 14 | 13 and 6                                          | 257     |

**Cochrane Library (methods register)**

|   |                                   |     |
|---|-----------------------------------|-----|
| 1 | stard:ti,ab                       | 55  |
| 2 | (reporting near/6 diagnos*):ti,ab | 484 |
| 3 | (quality near/8 diagnos*):ti,ab   | 591 |
| 4 | (reporting near/8 accuracy):ti,ab | 116 |
| 5 | (quality near/8 accuracy):ti,ab   | 90  |
| 6 | #1 or #2 or #3 or #4 or #5        | 246 |

**Total number of search results after deduplication: 518**
